# Supplementary material for: Preparation and characterization of flexible furosemide-loaded biodegradable microneedles for intradermal drug delivery
Source: Royal Society of Chemistry journal article supplement (doi:10.1039/d2bm01143c), 2022-01-01
Supplement: d2bm01143c1.pdf [file d2bm01143c1.pdf]

## Supporting Information

### Preparation and Characterization of Flexible Furosemide-loaded Biodegradable Microneedles for Intradermal Drug Delivery

Arsalan **Abu-Much**<sup>1,2,‡</sup>, Raya **Darawshi**<sup>3,‡</sup>, Hala **Dawud**<sup>3</sup>, Haytam **Kasem**<sup>4</sup> and Aiman **Abu**

**Ammar**<sup>3,\*</sup>

<sup>1</sup> Leviev Heart Center, Chaim Sheba Medical Center, Tel Hashomer, Ramat Gan, Israel.

<sup>2</sup> Sackler School of Medicine, Tel Aviv University, Tel-Aviv, Israel.

<sup>3</sup> Department of Pharmaceutical Engineering, Azrieli College of Engineering Jerusalem, Jerusalem, Israel.

<sup>4</sup> Department of Mechanical Engineering, Azrieli College of Engineering Jerusalem, Jerusalem, Israel.

‡ These authors have contributed equally to this work

\* **Corresponding author:**

**Aiman Abu Ammar**

Department of Pharmaceutical Engineering, Azrieli College of Engineering Jerusalem

26 Yaakov Shreibom Street, Ramat Beit Hakerem, Jerusalem 9103501, Israel

Tel: +972-2-6591835

Email: [aimanab@jce.ac.il](mailto:aimanab@jce.ac.il)

ORCID iD: <https://orcid.org/0000-0002-2556-3120>

## Contents:

**Figure S1.** Calibration curve of FUR in methanol at 275 nm.

**Figure S2.** Calibration curve of FUR in PBS pH 7.4 at 277 nm.

**Figure S3.** PXRD of PLGA.

**Figure S4.** Microscopy images of MN arrays before (A) and after compression study against (B) *ex vivo* chicken skin and (C) a flat block of aluminum.

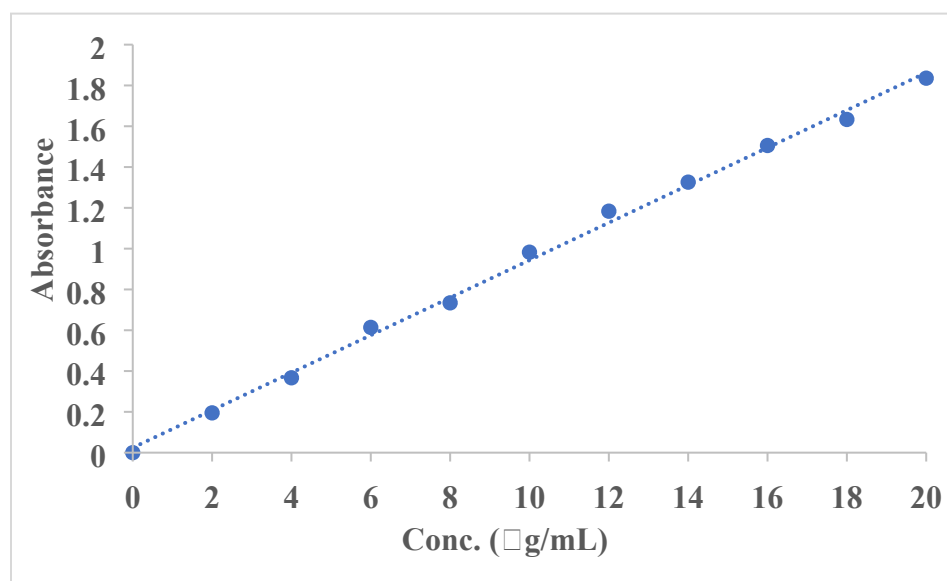

**Figure S1.** Calibration curve of FUR in methanol at 275 nm.

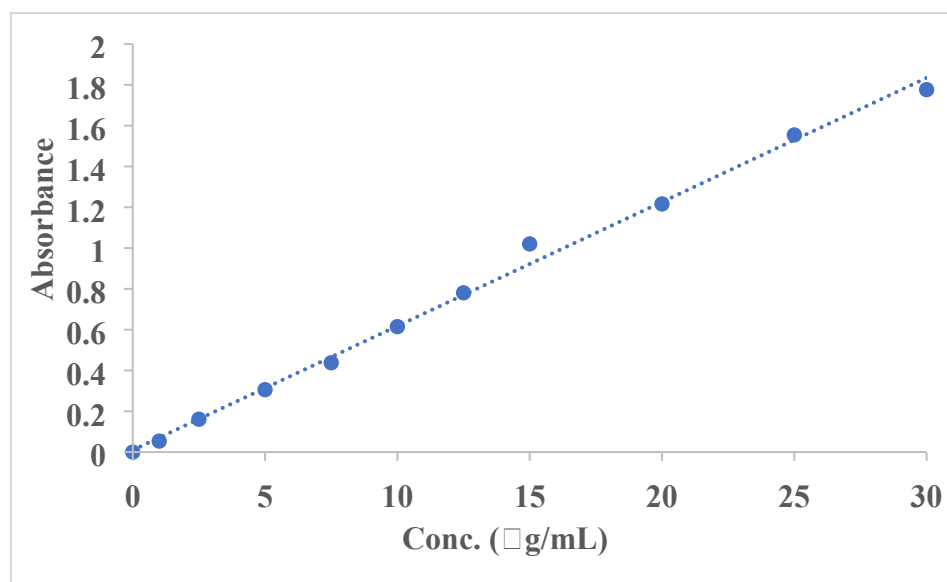

**Figure S2.** Calibration curve of FUR in PBS pH 7.4 at 277 nm.

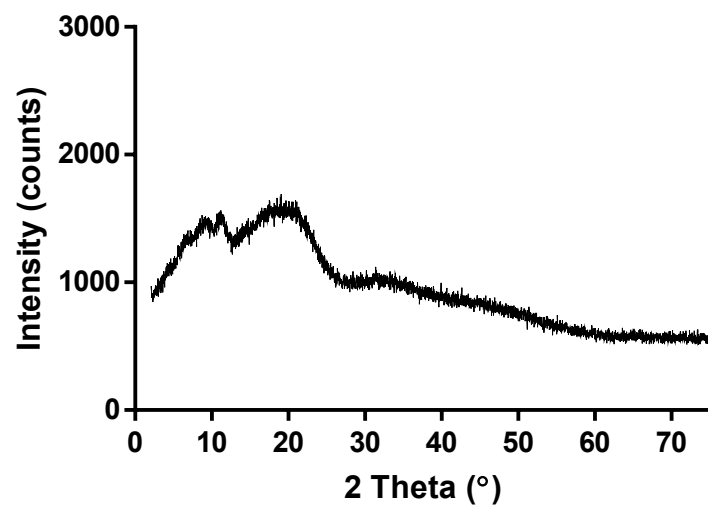

**Figure S3.** PXRD of PLGA.

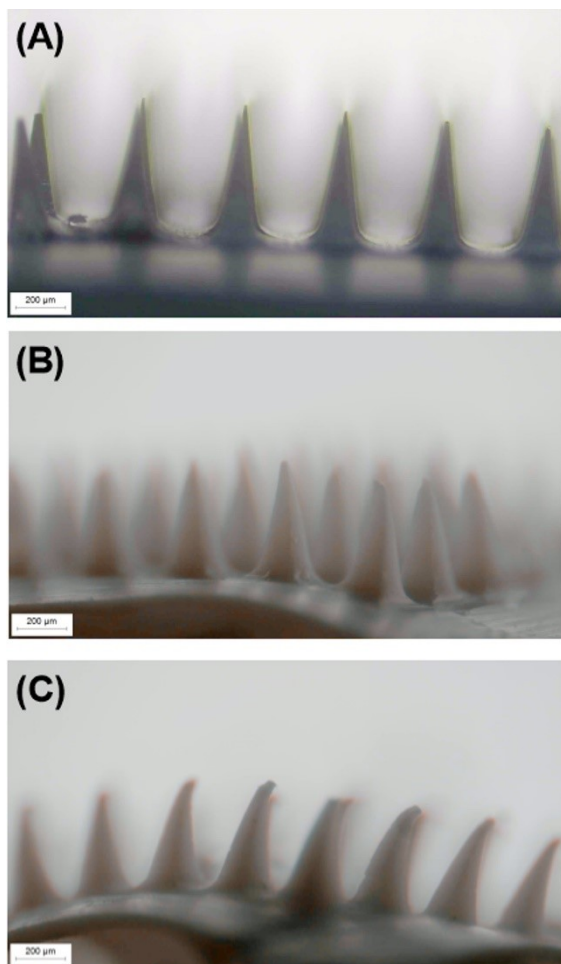

**Figure S4.** Microscopy images of MN arrays before (A) and after compression study against (B) *ex vivo* chicken skin and (C) a flat block of aluminum.
